# Supplementary material for: Base resolution maps reveal the importance of 5-hydroxymethylcytosine in a human glioblastoma
Source: PubMed Central journal article supplement (PMC5677956; doi:10.1038/s41525-017-0007-6), 2017-03-13

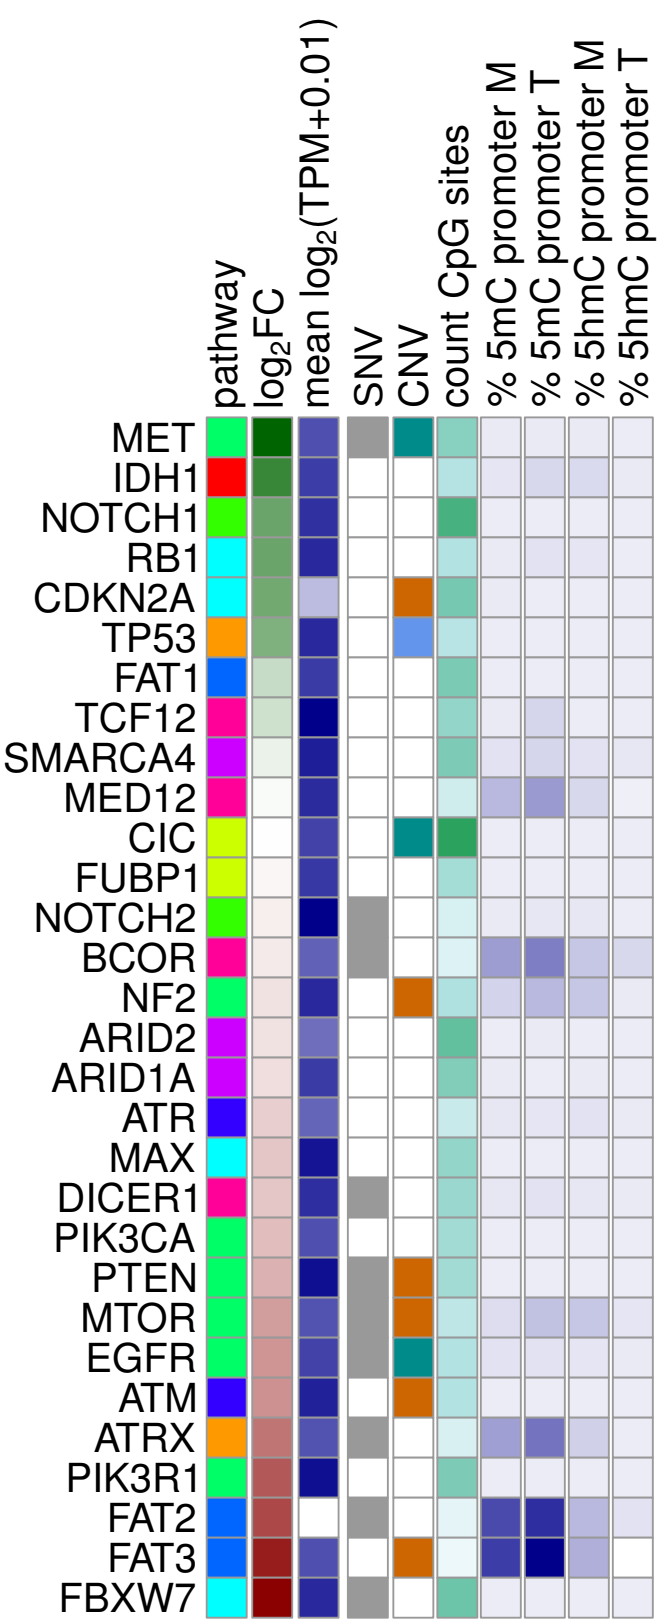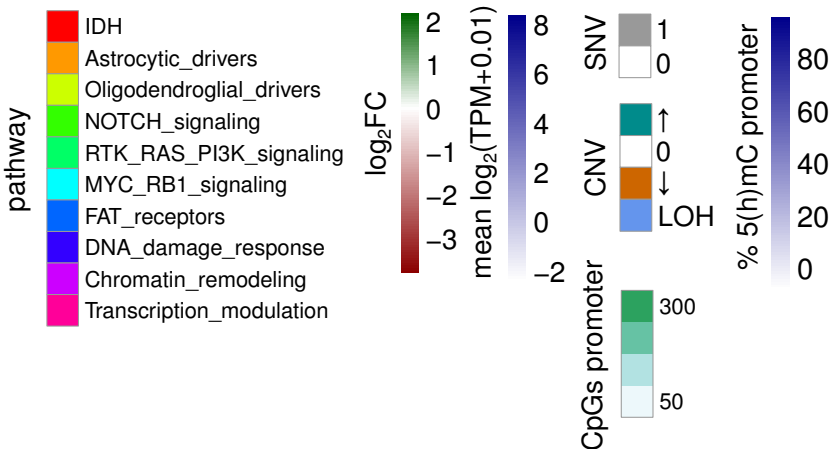

Supplement: 41525_2017_7_MOESM1_ESM.pdf [file 41525_2017_7_MOESM1_ESM.pdf]
